# Supplementary material for: Distribution, water quality, and health risk assessment of trace elements in three streams during the wet season, Guiyang, Southwest China
Source: Oxford University Press journal article supplement (doi:10.1525/elementa.2021.00133), 2021-01-01
Supplement: 2.supplementary_material-final.docx [file 2.supplementary_material-final.docx]

**Supplementary Material for**

Distribution, water quality, and health risk assessment of trace elements in three streams during the wet season, Guiyang, Southwest China

Jue Zhang 1, Qixin Wu 1*, Zhuhong Wang 2, Shilin Gao1, Huipeng Jia 1, Yuanyi Shen 1

1 Key Laboratory of Karst Geological Resource and Environment, Ministry of Education, the College of Resources and Environmental Engineering, Guizhou University, Guiyang 550025, China;

2 School of Public Health, Key Laboratory of Environmental Pollution and Disease Monitoring of Ministry of Education, Guizhou Medical University, Guiyang 550000, China;

*****Correspondence: [qxwu@gzu.edu.cn](mailto:qxwu@gzu.edu.cn)

**List of Contents:**

**Figure S1.** Scree plot of the percentage of variances explained by each principal component.

**Figure S2.** Sheppard plot for NMDS data.

**Figure S3.** Boxplots for trace elements among different sampling dates.

**Table S1.** More details about three streams.

**Table S2.** The relevant exposure variables of health risk assessment.

**Table S3.** The water parameters and trace elements (unit in,μg/L) in the three streams (Youyu, Baiyan, Jinzhong).

**Table S4.** Comparison of trace element concentrations in the three streams (Baiyan, Jinzhong, Youyu).

**Table S5.** Total variance explained of each principal component.

**Table S6.** Loadings for principal components used in PCA analysis.

**References**

**
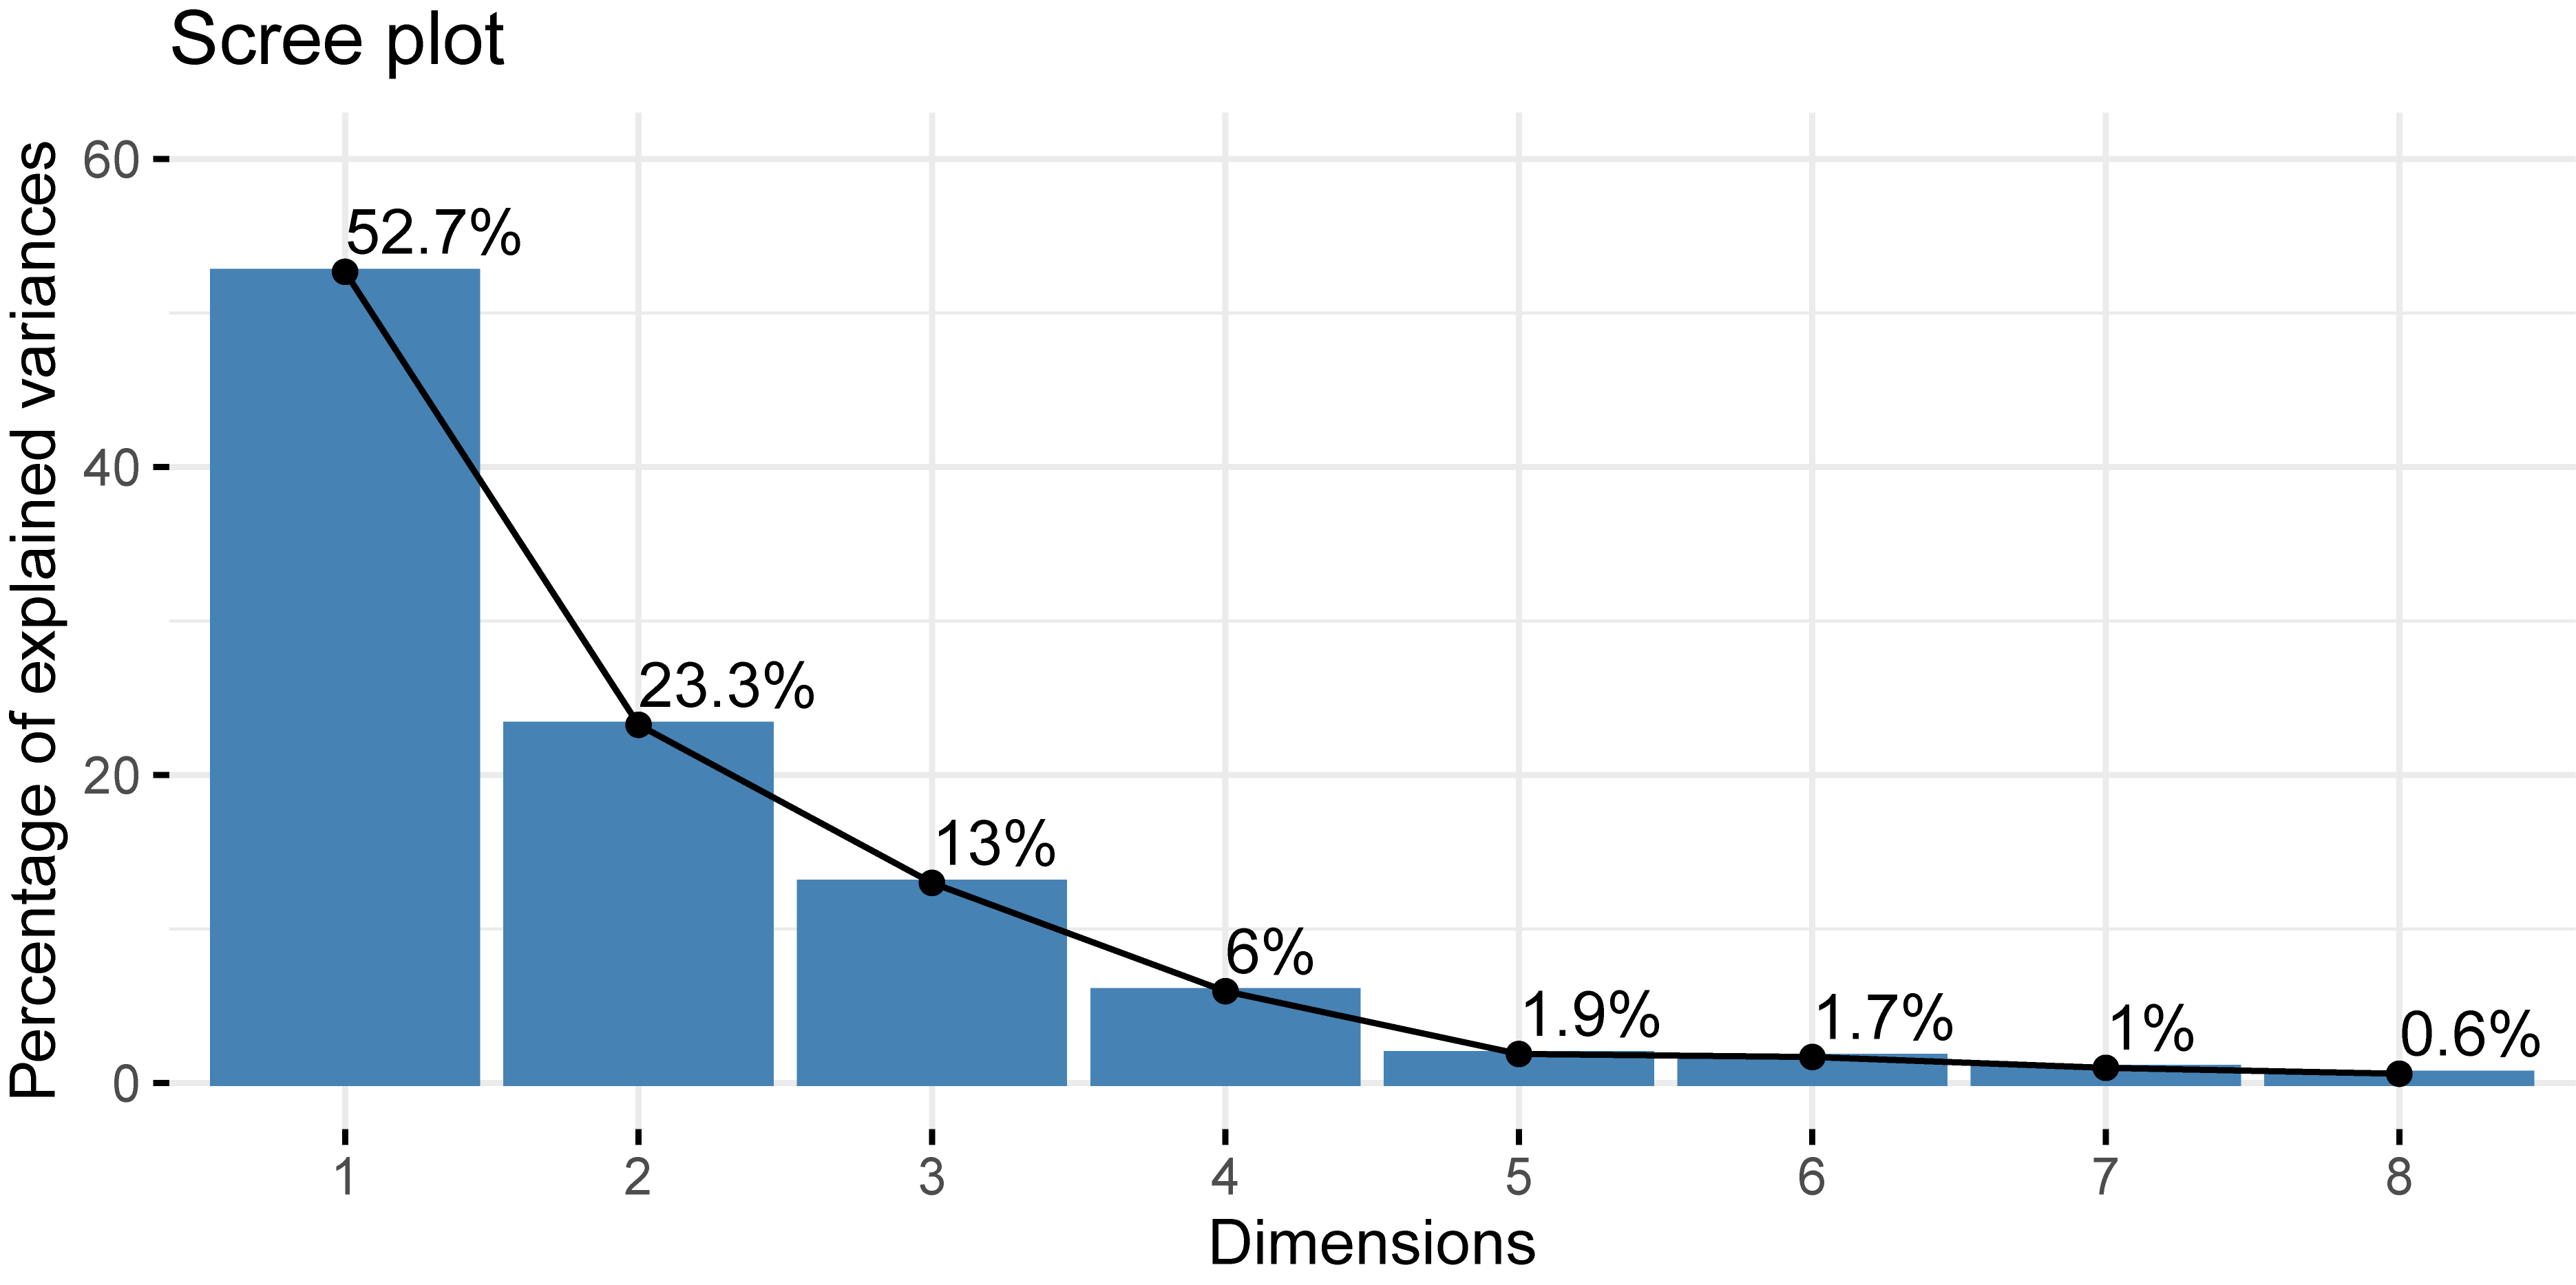
**

**Figure S1.** Scree plot of the percentage of variances explained by each principal component.
**Figure S2.** Sheppard plot for NMDS data.



**Figure S3.** Boxplots for trace elements among different sampling dates.

**Table S1.** More details about three streams.

| **Tributary** | **Lengtha**  **(km)** | **Drainage areaa**  **(km2)** | **Dischargeb (m3/s)** | **Land use and land cover (%)** | | | | |
| --- | --- | --- | --- | --- | --- | --- | --- | --- |
| **Forest** | **Agriculture** | **Grassland** | **Water** | **Urbanc** |
| Baiyan Stream | 15 | 51.5 | 0.90 | 40.2 | 36.6 | 4.3 | 0.6 | 18.3 |
| Jinzhong Stream | 16.5 | 47.5 | 0.83 | 9.5 | 6.4a | 1.6 | 0.8 | 81.6a |
| Youyu Stream | 18.5 | 61.9 | 1.15 | 36.9 | 53.0 | 6.0 | 0.5 | 3.3a |

a Zhang et al. (2019);

b Yang et al. (2011);

c Urban: residential and business areas, industrial, transportation, mixed land.

**Table S2.** The relevant exposure variables of health risk assessment.

| **Variables** | **Means** | **Units** |  |
| --- | --- | --- | --- |
|  | the average daily exposure doses by ingestion | μg/kg/day |  |
|  | the average daily exposure doses by dermal absorption | μg/kg/day |  |
|  | chemical concentration in water | μg/L |  |
| IR | ingestion rate for water | L/day | Adult: 2 |
| Child:0.64 |
| ET | exposure time | h/day | Adult: 1 |
| Child: 0.58 |
| ED | exposure duration | years | Adult: 30 |
| Child: 6 |
| BW | bodyweight | kg | Adult: 70 |
| Child: 15 |
| SA | skin surface area available for contact | cm2 | Adult: 18000 |
| Child: 6600 |
| Kp | the dermal permeability coefficient of compounds in water | cm/h |  |
| AT | averaging time | day | ED×365d |
| EF | exposure frequency | days/year | 350 |

**Table S3.** The water parameters and trace elements (unit in,μg/L) in the three streams (Youyu, Baiyan, Jinzhong).

| **Sample** | **Sample location** | **pH** | **DO(mg/L)** | **EC(μS/cm)** | **As** | **Ba** | **Cd** | **Fe** | **Li** | **Mo** | **Sr** | **Zn** | **WQI** |
| --- | --- | --- | --- | --- | --- | --- | --- | --- | --- | --- | --- | --- | --- |
| **Youyu Stream** | |  |  |  |  |  |  |  |  |  |  |  |
| YY-1 | N 26°31’6’’ E 106°37’16’’ | 7.90 | 8.06 | 627.50 | 0.78 | 32.07 | 0.01 | 28.37 | 4.66 | 1.98 | 534.11 | 1.47 | 4.78 |
| YY-2 | N 26°30’25.47’’ E 106°36’21.40’’ | 8.11 | 8.05 | 847.67 | 0.33 | 23.24 | 0.00 | 39.94 | 4.99 | 1.53 | 620.73 | 0.97 | 4.15 |
| YY-3 | N 26°29’49.11’’ E 106°35’16.51’’ | 8.18 | 8.18 | 1016.80 | 0.10 | 16.58 | 0.01 | 72.69 | 15.59 | 1.09 | 618.42 | 1.10 | 5.62 |
| YY-4 | N 26°29’52.73’’ E 106°35’10.15’’ | 8.30 | 8.13 | 758.40 | 0.12 | 17.68 | 0.01 | 45.43 | 8.31 | 0.81 | 599.86 | 0.69 | 3.81 |
| YY-5 | N 26°29’32.34’’ E 106°34’54.74’’ | 7.91 | 7.91 | 542.33 | 0.11 | 15.26 | 0.01 | 30.94 | 3.17 | 0.70 | 468.67 | 0.82 | 2.76 |
| YY-6 | N 26°29’29.06’’ E 106°34’59.46’’ | 8.02 | 8.03 | 648.75 | 0.16 | 17.26 | ndb | 35.07 | 3.47 | 0.89 | 530.53 | 0.57 | 3.18 |
| YY-7 | N 26°29’13.55’’ E 106°32’33.53’’ | 7.48 | 5.27 | 553.83 | 0.25 | 16.41 | ndb | 27.80 | 0.74 | 0.62 | 420.25 | 0.93 | 2.85 |
| YY-8 | N 26°29’14.86’’ E 106°32’38.35’’ | 7.52 | 6.83 | 551.80 | 0.39 | 21.23 | 0.01 | 35.42 | 0.55 | 0.88 | 533.87 | 0.83 | 3.88 |
| YY-9 | N 26°29’38.44’’ E 106°32’41.35’’ | 7.45 | 6.76 | 1126.00 | 0.30 | 20.66 | 0.02 | 64.13 | 6.64 | 1.06 | 580.78 | 1.82 | 5.66 |
| Average |  | 7.87 | 7.47 | 741.45 | 0.28 | 20.04 | 0.01 | 42.20 | 5.35 | 1.06 | 545.25 | 1.02 | 4.08 |
| **Baiyan Stream** | |  |  |  |  |  |  |  |  |  |  |  |
| BY-10 | N 26°33’8’’ E 106°35’17’’ | 8.09 | 7.40 | 372.00 | 1.27 | 27.31 | 0.01 | 19.02 | 2.07 | 2.44 | 278.96 | 1.91 | 5.42 |
| BY-11 | N 26°33’8’’ E 106°35’18’’ | 8.27 | 7.72 | 400.67 | 1.09 | 27.86 | 0.01 | 17.97 | 2.17 | 2.96 | 293.02 | 3.71 | 5.02 |
| BY-12 | N 26°33’40.56’’ E 106°36’31.99’’ | 8.01 | 7.19 | 473.60 | 0.94 | 28.08 | 0.01 | 21.35 | 2.19 | 2.01 | 318.33 | 1.60 | 4.66 |
| BY-13 | N 26°33’45.2’’ E 106°37’50.41’’ | 7.67 | 5.59 | 755.17 | 1.04 | 48.28 | 0.05 | 30.15 | 3.63 | 2.13 | 500.49 | 3.01 | 6.02 |
| BY-14 | N 26°29’13.55’’ E 106°32’33.53’’ | 8.09 | 6.04 | 561.83 | 0.94 | 35.56 | 0.02 | 23.31 | 2.77 | 2.06 | 351.84 | 3.33 | 4.97 |
| BY-15 | N 26°33’44.72’’ E 106°38’3.77’’ | 7.82 | 6.33 | 635.60 | 1.05 | 44.47 | 0.01 | 34.29 | 3.90 | 2.40 | 479.15 | 1.63 | 6.12 |
| Average |  | 7.99 | 6.71 | 533.14 | 1.05 | 35.26 | 0.02 | 24.35 | 2.79 | 2.33 | 370.30 | 2.53 | 5.37 |
| **Jinzhong Stream** | |  |  |  |  |  |  |  |  |  |  |  |
| JZ-16 | N 26°37’51’’ E 106°37’46’’ | 7.76 | 6.15 | 373.00 | 1.70 | 26.25 | 0.01 | 16.35 | 2.49 | 1.88 | 368.95 | 2.17 | 6.18 |
| JZ-17 | N 26°35’4.98’’ E 106°38’19.46’’ | 8.02 | 6.33 | 655.50 | 1.97 | 44.88 | 0.01 | 27.35 | 8.39 | 3.32 | 400.30 | 4.21 | 8.17 |
| JZ-18 | N 26°33’36.55’’ E 106°39’0.52’’ | 8.35 | 7.36 | 578.33 | 1.77 | 37.61 | 0.01 | 24.99 | 7.30 | 2.87 | 600.35 | 3.24 | 7.31 |
| Average |  | 8.04 | 6.61 | 535.61 | 1.81 | 36.25 | 0.01 | 22.90 | 6.06 | 2.69 | 456.53 | 3.21 | 7.22 |
| **Weighta** |  |  |  |  | 5 | 2 | 5 | 4 | - | 3 | - | 1 |  |
| **Relative weight (Wi)** | |  |  |  | 0.25 | 0.1 | 0.25 | 0.2 | - | 0.15 | - | 0.05 |  |

a Xiao et al. (2014)

b nd: no data.

**Table S4.** Comparison of trace element concentrations in the three streams (Baiyan, Jinzhong, Youyu).

|  | **Li** | **Fe** | **Zn** | **As** | **Sr** | **Mo** | **Cd** | **Ba** |
| --- | --- | --- | --- | --- | --- | --- | --- | --- |
| BY-YY | No difference | BY<YY  (P<0.05) | BY>YY  (P=0.01) | BY>YY  (P<0.05) | BY<YY  (P<0.05) | BY>YY  (P<0.05) | No difference | BY>YY  (P<0.05) |
| BY-JZ | BY<JZ  (P<0.05) | No difference | BY<JZ  (P=0.04) | BY<JZ  (P=0.019) | BY<JZ  (P=0.027) | No difference | No difference | No difference |
| JZ-YY | JZ>YY  (P=0.02) | JZ<YY  (P=0.003) | JZ>YY  (P<0.05) | JZ>YY  (P<0.05) | No difference | JZ>YY  (P<0.05) | No difference | JZ>YY  (P<0.05) |

**Table S5.** Total variance explained of each principal component.

Importance of components:

PC1 PC2 PC3 PC4 PC5 PC6

Standard deviation 2.0527 1.3639 1.0193 0.6902 0.3877 0.3670

Proportion of Variance 0.5267 0.2325 0.1299 0.0596 0.0188 0.0168

Cumulative Proportion 0.5267 0.7592 0.8891 0.9487 0.9674 0.9843

PC7 PC8

Standard deviation 0.2797 0.2180

Proportion of Variance 0.0098 0.0059

Cumulative Proportion 0.9941 1.0000

**Table S6.** Loadings for principal components used in PCA analysis.

Loadings:

|  | Comp.1 | Comp.2 | Comp.3 | Comp.4 | Comp.5 |
| --- | --- | --- | --- | --- | --- |
| As | 0.43819 | 0.10938 | -0.28037 | 0.13178 | 0.06648 |
| Ba | 0.39803 | 0.29111 | 0.15430 | 0.45208 | -0.42504 |
| Cd | 0.14088 | 0.27381 | 0.85361 | -0.08752 | -0.00766 |
| Fe | -0.36159 | 0.44425 | 0.04993 | -0.22770 | -0.04463 |
| Li | -0.15458 | 0.61389 | -0.30463 | -0.36027 | -0.28462 |
| Mo | 0.44063 | 0.18893 | -0.25808 | -0.00264 | -0.17470 |
| Sr | -0.31864 | 0.40481 | -0.08382 | 0.68987 | 0.44621 |
| Zn | 0.42354 | 0.23351 | -0.00198 | -0.33621 | 0.70868 |

**References**

Xiao J, Jin Z, Wang J. 2014. Geochemistry of trace elements and water quality assessment of natural water within the Tarim River Basin in the extreme arid region, NW China. *Journal of Geochemical Exploration* **136**: 118-126. doi:10.1016/j.gexplo.2013.10.013.

Yang S, Wu P, Zhang R, Zhang C, Han Z. 2011. Contributory rate of iron and manganese ingredients in typical tributaries of the Aha Reservoir. Guizhou. *Journal of Safety and Environment* **11**(05): 98-102. doi:10.3969/j.issn.1009-6094.2011.05.022.

Zhang J, Wang Z, Wu Q, An Y, Jia H, et al. 2019. Anthropogenic Rare Earth Elements: Gadolinium in a Small Catchment in Guizhou Province, Southwest China. *Int J Environ Res Public Health* **16**(20). doi:10.3390/ijerph16204052.
